# Supplementary material
Source: PubMed Central journal article supplement (PMC9444971)
Supplement: NIHMS1820273-supplement-2.pdf [file NIHMS1820273-supplement-2.pdf]

**Supplemental Table 1.** Paired specimen patient characteristics of in the talazoparib neoadjuvant feasibility study TiME subgroup

|                                                |                |                     |
|------------------------------------------------|----------------|---------------------|
| Age (years)                                    | Median (range) | 40 (32-55)          |
| Race                                           | White          | 5                   |
|                                                | Black          | 4                   |
|                                                | Hispanic       | 1                   |
|                                                | Asian          | 1                   |
| Clinical stage <sup>a</sup>                    | I              | 2                   |
|                                                | II             | 7                   |
|                                                | III            | 2                   |
| Clinical nodal stage                           | N0             | 9                   |
|                                                | N1             | 1                   |
|                                                | N2-3           | 1                   |
| Hormone-receptor status                        | Positive       | 4                   |
|                                                | Negative       | 7                   |
| <i>BRCA</i> Status                             | <i>BRCA1</i>   | 8                   |
|                                                | <i>BRCA2</i>   | 3                   |
| Histology                                      | Ductal         | 10                  |
|                                                | Metaplastic    | 1                   |
| Grade                                          | 1              | 0                   |
|                                                | 2              | 1                   |
|                                                | 3              | 10                  |
| Percent decrease in tumor volume by ultrasound | Median (range) | 87.6 (29.8 to 97.8) |
| Residual cancer burden                         | 0              | 5                   |
|                                                | I              | 3                   |
|                                                | II             | 3                   |
| Pathologic complete response                   | Yes            | 5                   |
|                                                | No             | 6                   |

<sup>a</sup>Anatomic Stage/Prognostic Groups AJCC 7<sup>th</sup> Edition.
