# Supplementary material
Source: PubMed Central journal article supplement (PMC9444971)

# Supplemental Figure 4

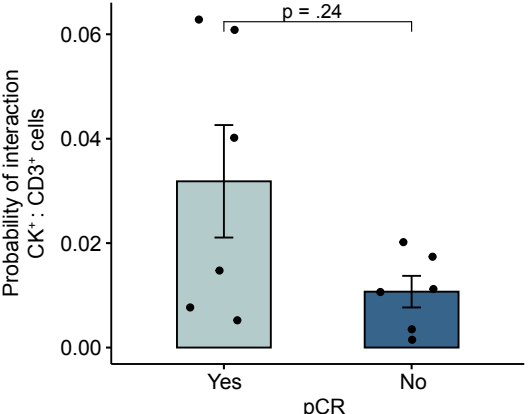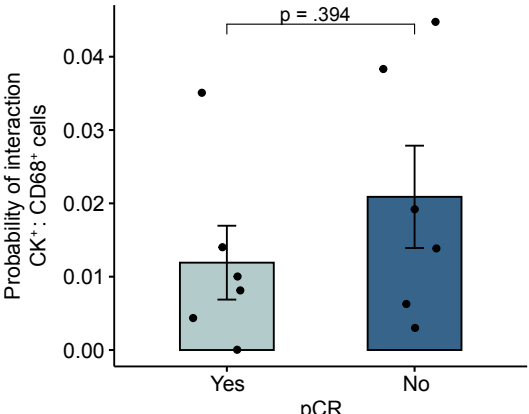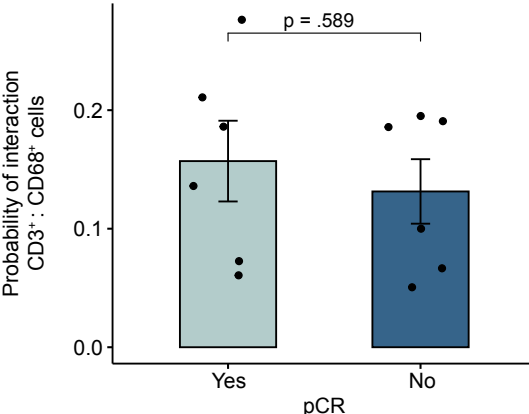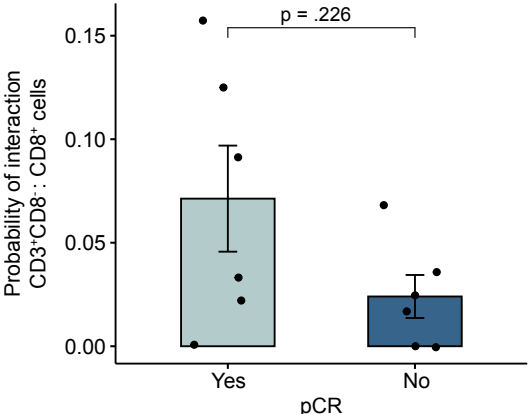

Supplement: NIHMS1820273-supplement-6.pdf [file NIHMS1820273-supplement-6.pdf]

# Supplemental Figure 5

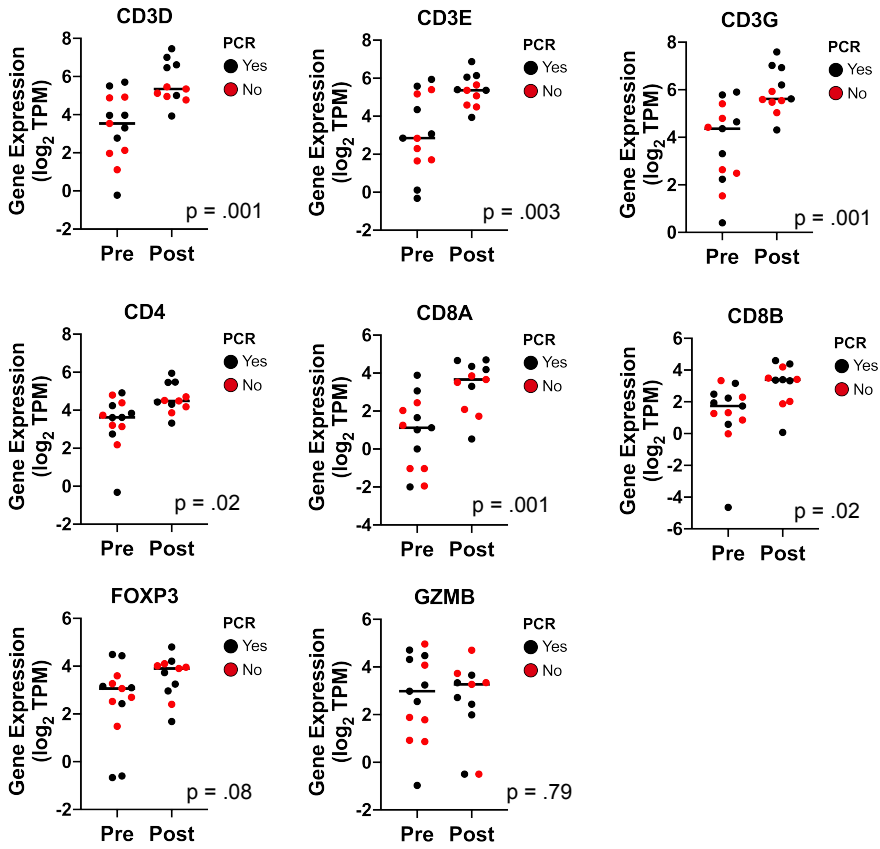

Supplement: NIHMS1820273-supplement-7.pdf [file NIHMS1820273-supplement-7.pdf]
